# Supplementary material for: Dynamic Chromatin Localization of Sirt6 Shapes Stress- and Aging-Related Transcriptional Networks
Source: PLoS Genet. 2011 Jun 30;7(6):e1002153. doi: 10.1371/journal.pgen.1002153 (PMC3128103; doi:10.1371/journal.pgen.1002153)
Supplement: Table S4 — List of ChIP-qPCR primers. Primer sequences used for validation of ChIP-chip. (XLSX) [file pgen.1002153.s007.xlsx]

## Sheet: Sheet1
Supplementary Table 4. List of ChIP_qPCR primers
NFkbia_FOR	GCC ATG GAG CAA ACC CAT AG
NFkbia_REV	ATT CCA TAG CGG GAG GTG TCT
NFkb2_FOR	CCA TGG CAG CGA CTC TTG T
NFkb2_REV	CTG CCT TCC CCC TGC AT
Cdkn2a_FOR	TGCACCGGTTTAAATTGTTC
Cdkn2a_REV	CCAAAGCGTGTTCTTCTTCC
Lmna_FOR	GGGAATGTGAGGAAGGAGAA
Lmna_REV	CAGCAGCACAGAGTGAGGAC
Cdkn1a_FOR	TCT TCC AGT CCT TGG AGA CC
Cdkn1a_REV	GCA CCT GGA ATC CCT AGA AA
Dll1_FOR	GCG TGG CTG TCA TTA AGG
Dll1_REV	GGT GCT GTC TGC ATT ACC
